# Supplementary material for: Mitochondrial-nuclear coadaptation revealed through mtDNA replacements in Saccharomyces cerevisiae
Source: PubMed Central journal article supplement (PMC7517635; doi:10.1186/s12862-020-01685-6), 2020-09-25

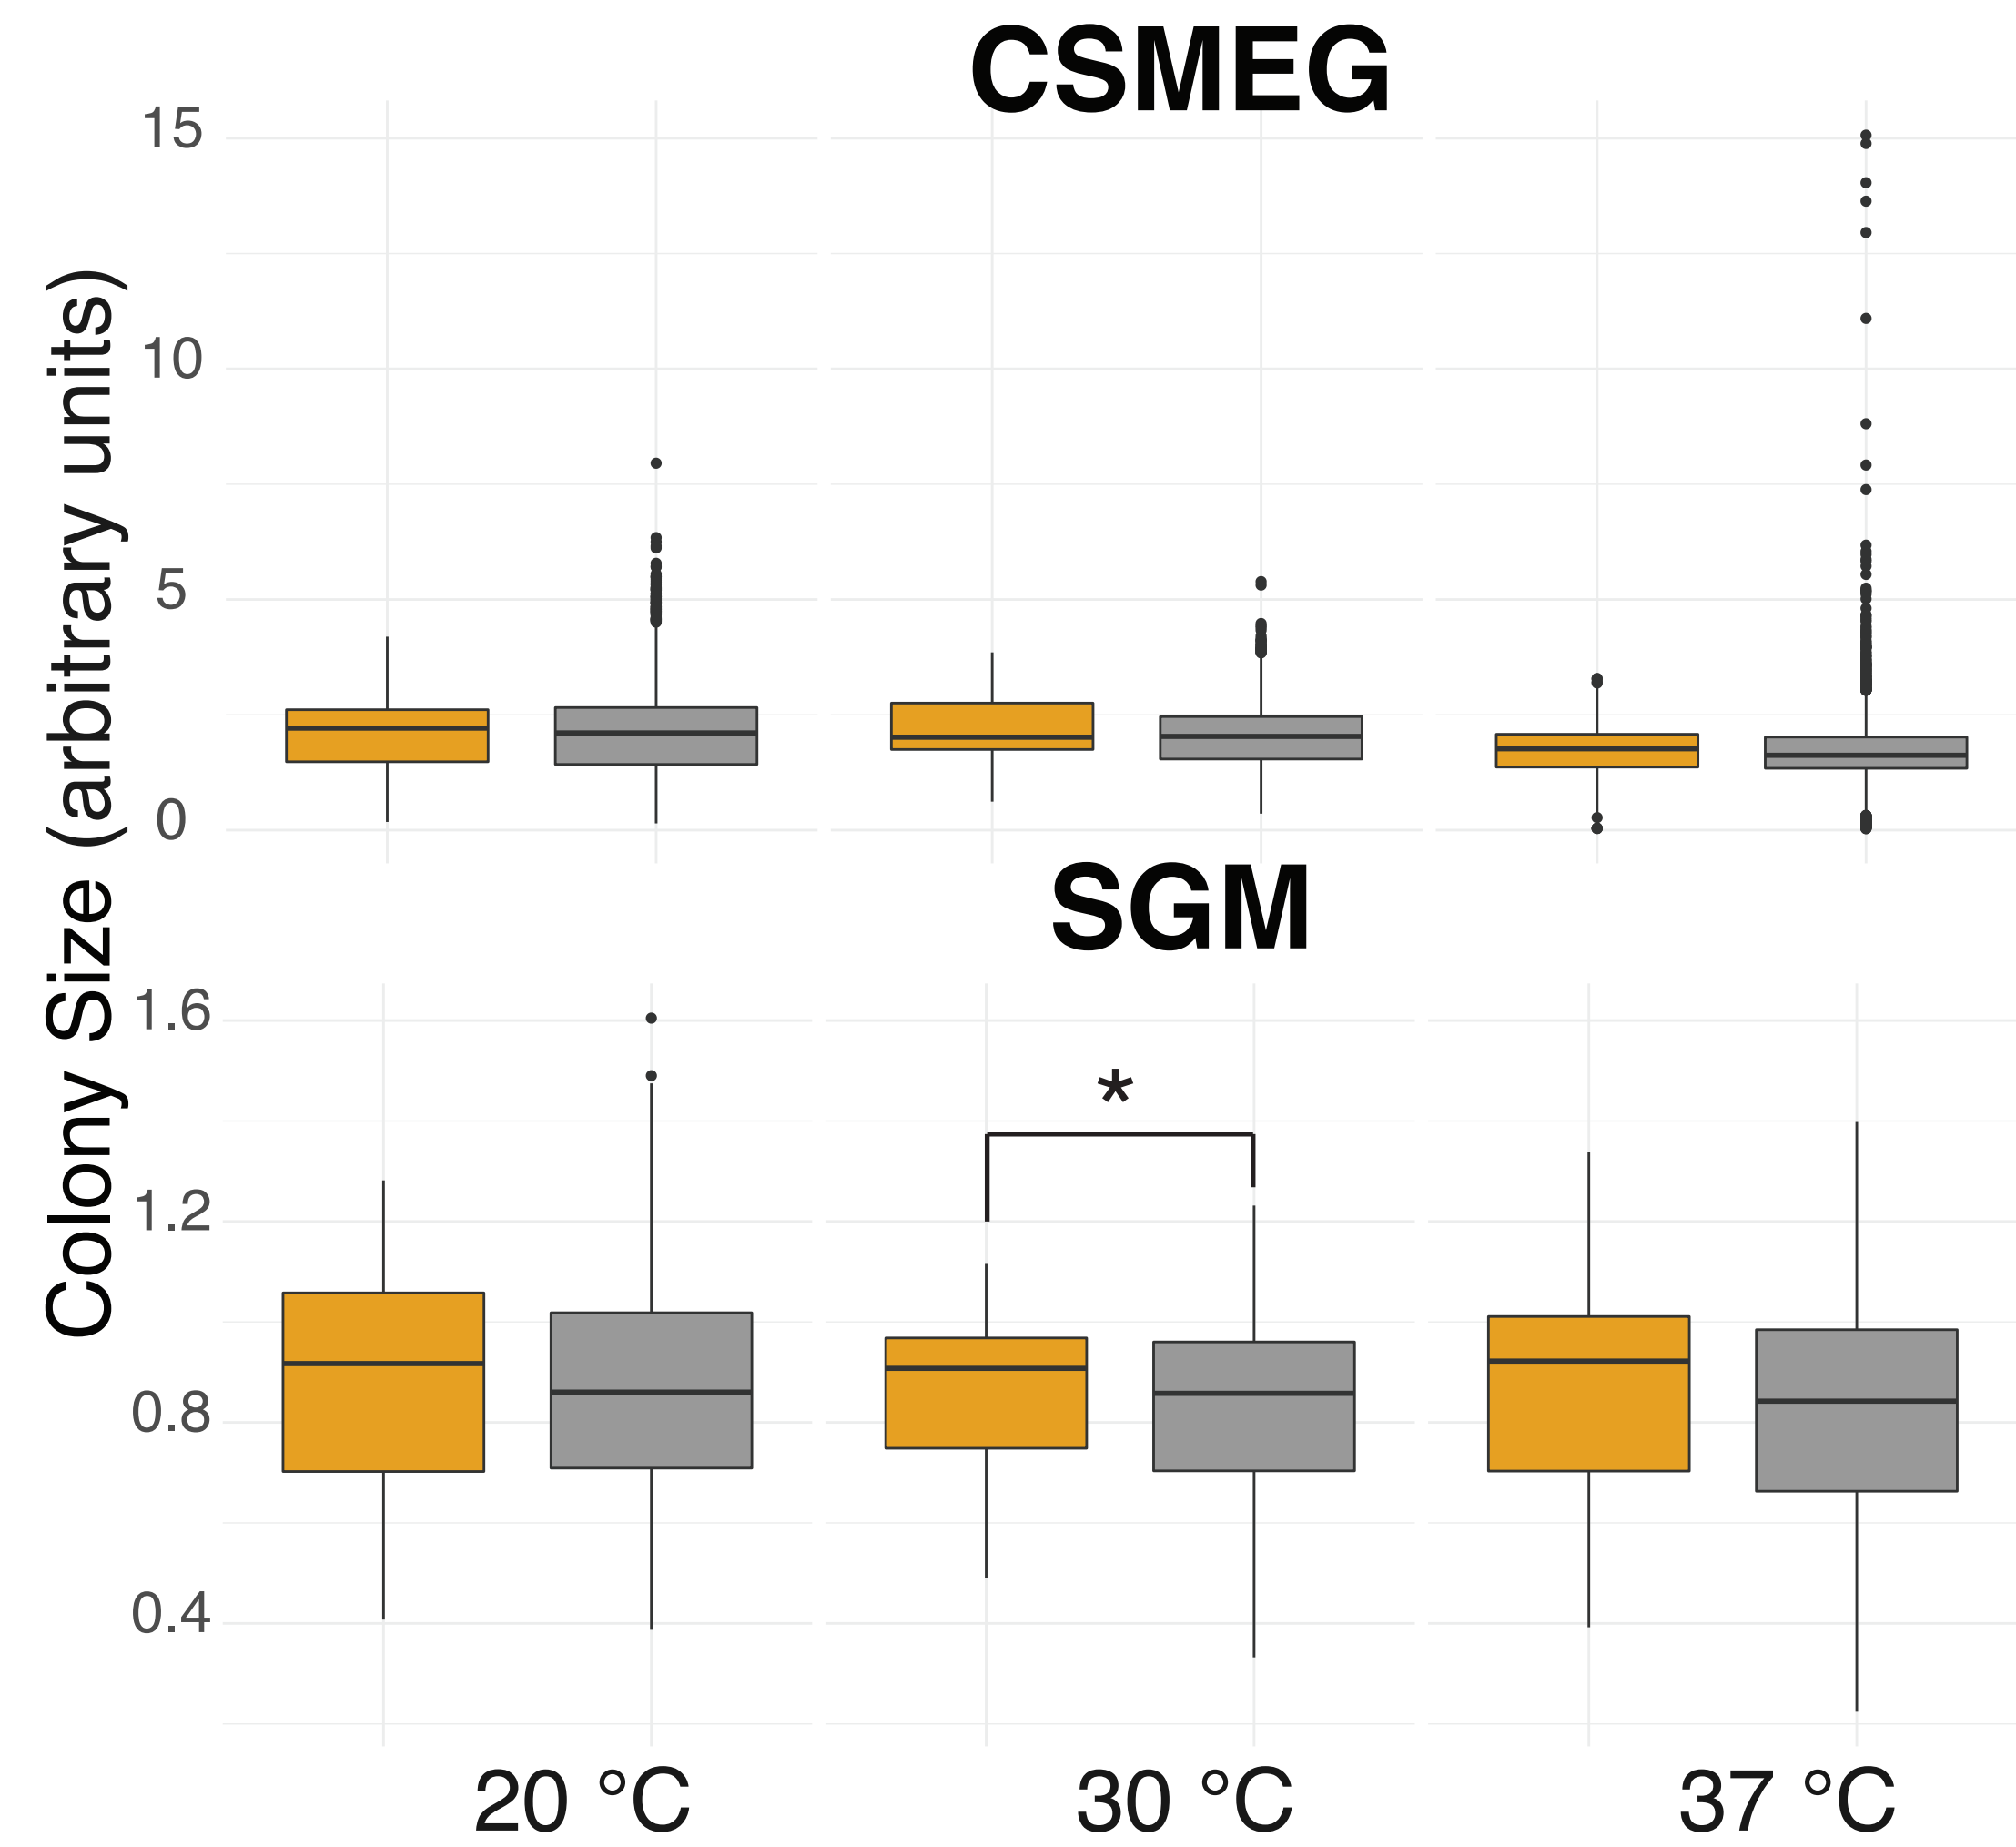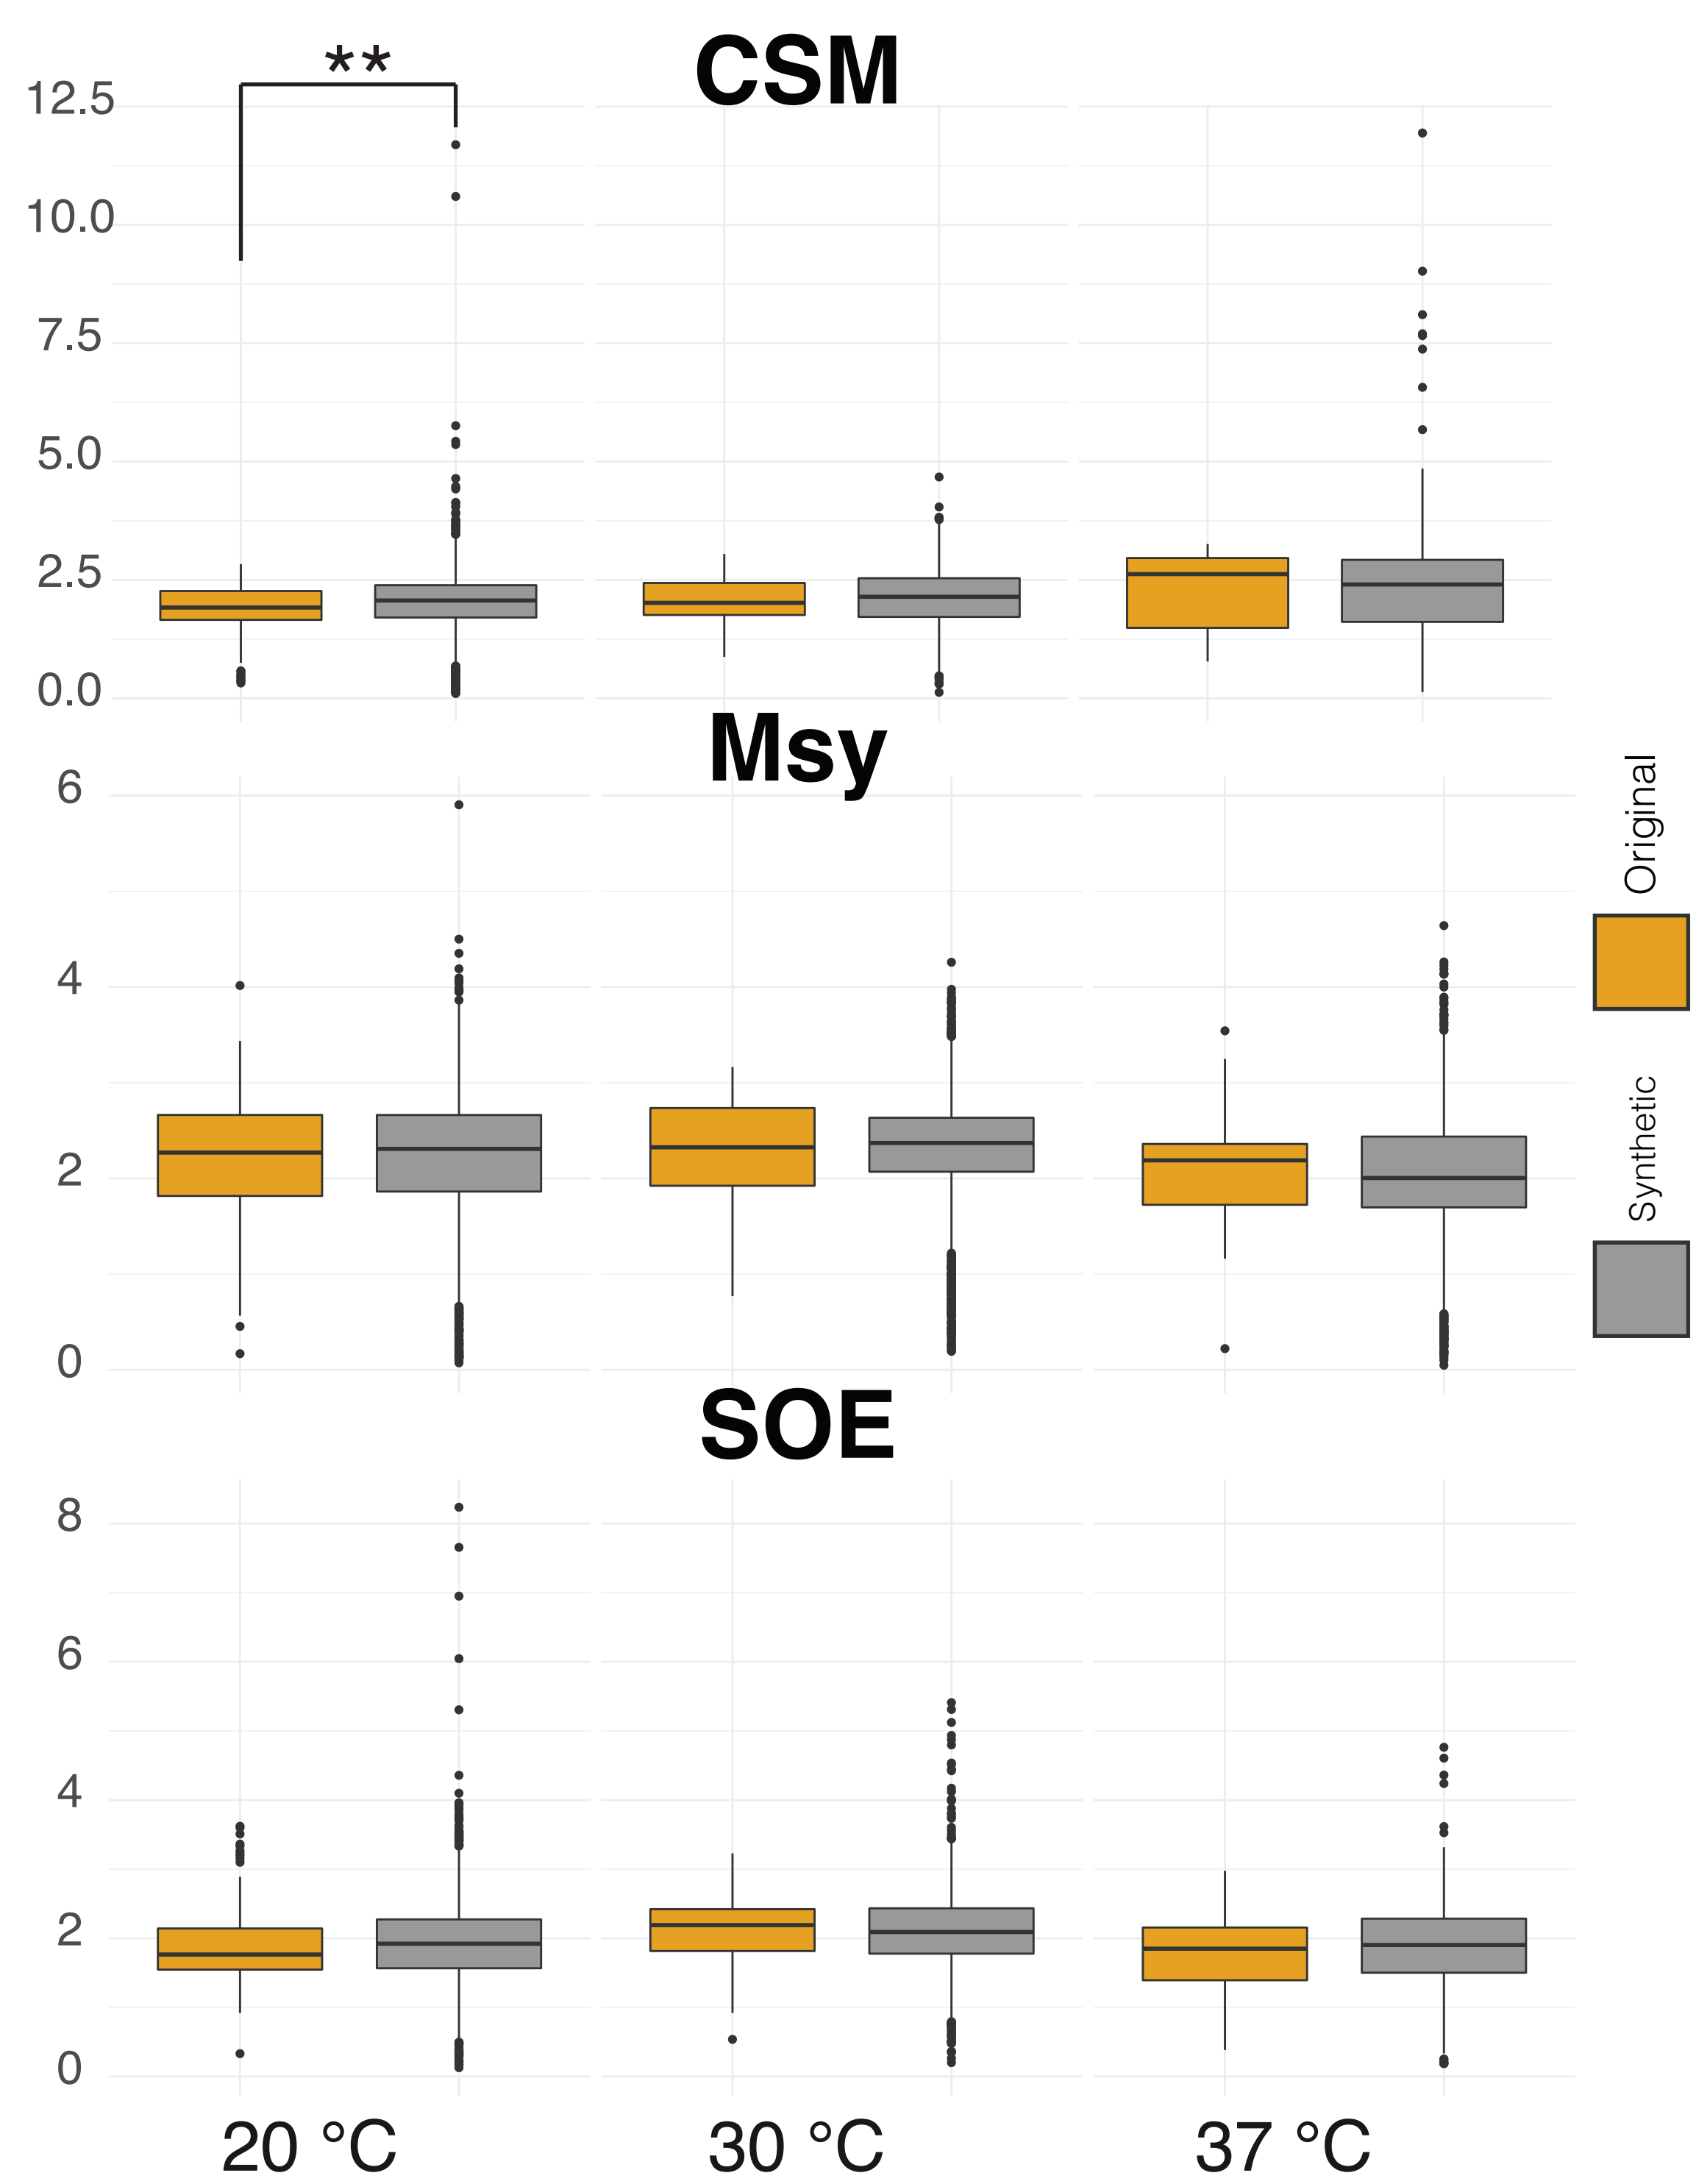

Supplement: 12862_2020_1685_MOESM3_ESM.pdf [file 12862_2020_1685_MOESM3_ESM.pdf]
